# 1 Workflow Intervals and Outcomes of Endovascular Treatment for Acute Large-Vessel

## 2 Occlusion During On- Versus Off-Hours in China

### 3 The ANGEL-ACT Registry

4

5 Yunlong Ding, MD<sup>1,2+</sup>; Feng Gao, MD<sup>2,3+</sup>; Yong Ji, MD<sup>2,3+</sup>; Tingting Zhai, MD<sup>1,2</sup>; Xu Tong,

6 MD<sup>4</sup>; Baixue Jia, MD<sup>4</sup>; Jian Wu, MD<sup>2,3,5</sup>; Jiaqi Wu, MD<sup>2,5</sup>; Yanrong Zhang, MD<sup>1,2</sup>; Can Wei,

7 BD<sup>1,2</sup>; Wenjuan Wang, BD<sup>1,2</sup>; Jue Zhou, MD<sup>1,2</sup>; Jiali Niu, MD<sup>2,6</sup>; Zhongrong Miao, MD<sup>4</sup>;

8 Yan Liu, MD<sup>1,2</sup>; on behalf of the ANGEL-ACT Study Group\*

9 <sup>1</sup>Department of Neurology, JingJiang People's Hospital, the Seventh Affiliated Hospital of

10 Yangzhou University, Jiangsu, China;

11 <sup>2</sup>Stroke Center, JingJiang People's Hospital, the Seventh Affiliated Hospital of Yangzhou

12 University, Jiangsu, China;

13 <sup>3</sup>Hospital office, JingJiang People's Hospital, the Seventh Affiliated Hospital of Yangzhou

14 University, Jiangsu, China;

15 <sup>4</sup>Department of Interventional Neuroradiology, Beijing Tiantan Hospital, Capital Medical

16 University, Beijing, China;

17 <sup>5</sup>Department of rehabilitation, JingJiang People's Hospital, the Seventh Affiliated Hospital of

18 Yangzhou University, Jiangsu, China;

19 <sup>6</sup>Department of Clinical Pharmacy, JingJiang People's Hospital, the Seventh Affiliated

20 Hospital of Yangzhou University, Jiangsu, China.

21 \*The ANGEL-ACT Study Group is listed in the Data Supplement.

22 <sup>+</sup>*Yunlong Ding, Feng Gao* and *Yong Ji* contributed equally to this work, and should be listed

23 as co-first authors.

1 **Corresponding authors.**

2 **Corresponding Author 1:** Yan Liu, Department of Neurology, JingJiang People's Hospital,  
3 the Seventh Affiliated Hospital of Yangzhou University. No. 28, Zhongzhou Road, Jingjiang,  
4 214500, Jiangsu, China. Email: liuyan151617@163.com;

5 **Corresponding Author 2:** Zhongrong Miao, Department of Interventional Neuroradiology,  
6 Beijing Tiantan Hospital, Capital Medical University, No. 119 South West Road, Fengtai  
7 District, Beijing 100070, China, Email: zhongrongm@163.com;

8 **Corresponding Author 3:** Jiali Niu, Department of Clinical Pharmacy, JingJiang People's  
9 Hospital, the Seventh Affiliated Hospital of Yangzhou University. No. 28, Zhongzhou Road,  
10 Jingjiang, 214500, Jiangsu, China. Email: jialiniu123@sina.com

11 **Abstract**

12 **Background**—Acute ischemic stroke (AIS) leads to a substantial burden of disease among  
13 the elderly. There may be a delay in or a poor outcome of endovascular treatment (EVT)  
14 among AIS patients with large-vessel occlusion (LVO) during off-hours. By using a  
15 prospective, nationwide registry, we compared the workflow intervals and  
16 radiological/clinical outcomes between patients with acute LVO treated with EVT presenting  
17 during off- and on-hours.

18 **Methods**—We analyzed prospectively collected Endovascular Treatment Key Technique and  
19 Emergency Work Flow Improvement of Acute Ischemic Stroke (ANGEL-ACT) data. Patients  
20 presenting during off-hours were defined as those presenting to the emergency department  
21 from Monday to Friday between the hours of 17:30 and 08:00, on weekends (from 17:30 on  
22 Friday to 08:00 on Monday), and on national holidays. We used logistic regression models

1 with adjustment for potential confounders to determine independent associations between the  
2 time of presentation and outcomes.

3 **Results**—Among 1788 patients, 1079 (60.3%) presented during off-hours. The median  
4 onset-to-door time and onset-to-reperfusion time were significantly longer during off-hours  
5 than on-hours (165 vs 125 minutes,  $P=0.002$  and 410 vs 392 minutes,  $P=0.027$ ). However,  
6 there were no significant differences between patients presenting during off- and on-hours in  
7 any radiological/clinical outcomes (mRS score: 3 vs 3 points,  $P=0.204$ ; mortality: 15.9% vs  
8 14.3%,  $P=0.172$ ; successful reperfusion: 88.5% vs 87.2%,  $P=0.579$ ; sICH: 7.2% vs 8.4%,  
9  $P=0.492$ ).

10 **Conclusions**—Off-hours presentation in the nationwide real-world registry was associated  
11 with a delay in the visit and reperfusion time of EVT in patients with AIS. However, this  
12 delay did not lead to worse radiological/clinical outcomes.

13 **Registraton:** URL: <https://www.clinicaltrials.gov>; Unique identifier: NCT03370939.

14 **Key Words:** endovascular treatment; off-hours; acute ischemic stroke; large vessel occlusion

15

# 1 Introduction

2 Stroke is the leading cause of death and disability in China<sup>1</sup>. Ischemic stroke accounts  
3 for 65%<sup>2</sup> of stroke patients in China, of whom 35-40% have large-vessel occlusion (LVO)<sup>1</sup>.  
4 LVO results in a large ischemic area and can cause severe brain damage<sup>3,4</sup>, leading to high  
5 mortality and disability rates<sup>5-7</sup>. As a landmark in the treatment of acute ischemic stroke (AIS)  
6 with proximal intracranial LVO<sup>8-12</sup>, endovascular treatment (EVT) has been widely used in  
7 real-world clinical practice. However, stroke causes 2 million neurons to undergo apoptosis  
8 every minute, and the brain ages 3.6 years per hour<sup>13</sup>. Therefore, performing EVT as soon as  
9 possible in patients with LVO is the key to improving the prognosis<sup>14, 15</sup>.

10 Approximately half of patients present during so-called off-hours, i.e., evenings, nights,  
11 weekends, and holidays, and EVT needs to be performed jointly by emergency department  
12 staff, digital subtraction angiography (DSA) room nurses, technicians, anesthesiologists, and  
13 surgeons. Therefore, off-hours presentation may be associated with a delay in the start of  
14 EVT. The MR CLEAN trial found that presentation during off-hours was associated with a  
15 slight delay of EVT but that this treatment delay did not translate into worse functional  
16 outcomes or an increased rate of complications<sup>16</sup>. Data on off-hours delays in workflow  
17 intervals have shown delays in different workflow intervals and related performance, but  
18 these data are mostly based on single-center studies and are difficult to interpret because of  
19 variations in acute stroke care<sup>17-20</sup>. However, there have been no multicenter studies on the  
20 association of off-hours presentation and EVT workflow intervals in Chinese patients with  
21 LVO.

1           The Endovascular Treatment Key Technique and Emergency Work Flow Improvement  
2   of Acute Ischemic Stroke (ANGEL-ACT) registry was established to evaluate the utilization  
3   and subsequent outcomes of AIS patients who received EVT and has confirmed that  
4   favorable outcomes of EVT can be achieved in clinical practice in China<sup>21</sup>. In this study, we  
5   analyzed prospectively collected ANGEL-ACT data to observe whether the workflow  
6   intervals and radiological/clinical outcomes were different between patients with acute LVO  
7   treated with EVT who presented during on- versus off-hours.

## 8   **Methods**

### 9   **Study Participants**

10           Data were derived from the ANGEL-ACT registry. ANGEL-ACT was a nationwide,  
11   prospective, observational study of 1793 consecutive adult patients with acute LVO treated  
12   with EVT at 111 hospitals from 26 provinces in China between November 2017 and March  
13   2019 (<https://www.clinicaltrials.gov>; unique identifier: NCT03370939). Detailed information  
14   about the ANGEL-ACT registry can be found in a previously published article<sup>21</sup>. Ethics  
15   approval was granted by the ethics committees of Beijing Tiantan Hospital and all  
16   participating centers. Subjects or their representatives provided written informed consent.

17           For the present study, patients who adhered to the following criteria were included: (1)  
18   age  $\geq 18$  years; (2) diagnosis of AIS on computed tomography (CT) angiography confirming  
19   intracranial LVO; and (3) initiation of any type of EVT, including mechanical thrombectomy,  
20   intra-arterial thrombolysis, stenting and angioplasty. Patients were divided into the on-hours  
21   group and the off-hours group based on their presentation time.

### 22   **Data Collection and Outcome Measures**

1 Off-hours presentation was defined as presentation to the emergency department  
2 (participating centers) from Monday to Friday between the hours of 17:30 and 08:00, on  
3 weekends (from 17:30 on Friday to 08:00 on Monday), and on national holidays.

4 All variables, including demographic data, medical history, vital signs, laboratory and  
5 neurovascular imaging results, workflow intervals, and clinical outcomes, were prospectively  
6 collected.

7 The workflow intervals included the door-to-puncture time, onset-to-puncture time,  
8 onset-to-door time, door-to-imaging time, onset-to-needle time, puncture-to-reperfusion time  
9 and onset-to-reperfusion time. The radiological and clinical outcomes included the 90-day  
10 modified Rankin Scale (mRS) score as an ordinal variable, functional independence (defined  
11 as a 90-day mRS score from 0 to 2), mortality within 90 days, successful reperfusion (defined  
12 as the modified Thrombolysis in Cerebral Infarction [mTICI] score of 2b or 3<sup>22</sup>), and  
13 symptomatic intracranial hemorrhage (sICH) within 24 hours according to the Heidelberg  
14 Bleeding Classification<sup>23</sup>.

## 15 **Statistical Analysis**

16 Statistical analyses were performed using SAS 9.4 (SAS Institute, Inc., Cary, NC). All  
17 data are described as the median (interquartile range [IQR]) for continuous/ordinal variables  
18 and number (percentage) for categorical variables. The Wilcoxon test was used  
19 for continuous/ordinal variables, and Fisher's exact test or the chi-square test was used for  
20 categorical variables. A *P*-value of < 0.05 was considered statistically  
21 significant. Multivariable logistic regression models were used to determine the independent  
22 associations between the time of presentation (on- versus off-hours) and radiological/clinical

1 outcomes, with adjustment for age, pre-treatment with intravenous thrombolysis (IVT),  
2 baseline NIHSS score, occlusion site, pre-stroke mRS score, and onset-to-door time.

### 3 **Results**

#### 4 **Baseline Characteristics**

5 Among the 1793 subjects included in the ANGEL-ACT registry, 5 were excluded  
6 because the admission time was missing, leaving 1788 patients eligible for analyses. In total,  
7 1079 patients (60.3%) presented to the emergency department during off-hours, and 709  
8 (39.7%) presented during on-hours. The baseline characteristics were similar in both groups  
9 except for the proportion of transferred patients. More patients in the off-hours group than in  
10 the on-hours group were transferred from primary stroke centers (36.98% versus 32.02%,  
11  $P=0.033$ ) (Table 1).

#### 12 **Workflow Intervals**

13 The median onset-to-door time during off-hours presentation was 165 (IQR: 70-295)  
14 minutes, which was significantly longer than that during on-hours presentation (125 [IQR:  
15 60-260] minutes,  $P=0.002$ ). The median onset-to-reperfusion time was also significantly  
16 longer during off-hours (410 [IQR: 310-561] minutes versus 392 [IQR: 285-546] minutes,  
17  $P=0.027$ ). The door-to-puncture time, onset-to-puncture time, door-to-imaging time,  
18 onset-to-needle time and puncture-to-reperfusion time were similar between the two groups  
19 (Table 2).

#### 20 **Radiological and Clinical Outcomes**

21 No difference was found in the 90-day mRS score between on- and off-hours  
22 presentation (median: 3 vs 3 points, adjusted common OR=0.892, 95% CI=0.748–1.064)

(Table 3 and Figure 1). We also found no difference between the two groups in the occurrence of functional independence (adjusted OR=0.892, 95% CI=0.724–1.098). The rates of successful reperfusion, mortality within 90 days and sICH were similar in both groups (Table 3).

## Discussion

This large-scale multicenter study reported the relationship of on- and off-hours presentation with workflow intervals and radiological/clinical outcomes and included over 1700 patients treated at 111 different comprehensive stroke centers in China. This study showed that although treatment was administered 40 minutes later in AIS patients presenting off-hours than in those presenting on-hours, there was no difference in the rate of functional independence at 90 days or in the mRS score distribution. In addition, there was no difference in the door-to-puncture time, the rates of successful reperfusion or sICH.

Similar to previous multicenter studies<sup>16, 24-27</sup>, this study did not reveal a difference in the prognosis or rate of complications between the two groups. Benali et al observed a significantly higher rate of good functional outcomes among inpatients admitted at night (51% vs. 35%,  $P = 0.05$ )<sup>28</sup>, but another study found a higher mortality rate among patients admitted at night for EVT<sup>29</sup>, which may be due to the heterogeneity of the stroke center process and sample size. Although this multicenter study did not observe an effect of on- versus off-hours presentation on the prognosis, exploring differences in the workflow intervals between the two groups may help to improve the efficiency of EVT implementation. Our research showed that the median onset-to-reperfusion time in off-hours patients was 410 minutes, 18 minutes longer than that in on-hours patients, indicating that there is a certain

1 delay in the EVT process for patients presenting off-hours. The times from onset to door,  
2 door to puncture and puncture to reperfusion need to be analyzed to assess the impact of  
3 off-hours presentation on the EVT process.

4 Off-hours patients have a longer onset-to-door time. The 40-minute gap suggests more  
5 delays before the hospitalization of off-hours patients. Experiencing a stroke after waking up  
6 at night may be an important contributing factor. Another factor may be transfers, as a higher  
7 proportion of off-hours patients required transfer. We speculate that some hospitals may not  
8 have the capability to provide EVT over 24 hours, so patients who are first diagnosed at these  
9 hospitals during off-hours may need to be transferred to a suitable stroke center. Previous  
10 research has also described this phenomenon<sup>16</sup>. Notably, in the treatment of patients requiring  
11 EVT, interhospital transfer will increase the onset-to-first door time<sup>30-32</sup>; therefore, in  
12 establishing the EVT process, the delay caused by referral should be recognized, special  
13 attention should be given to the impact of off-hours referrals, and effective publicity should  
14 be used to make patients aware of hospitals with 24-hour EVT capabilities in advance so that  
15 patients can be delivered directly after stroke onset.

16 The overall door-to-puncture time in this study was 124 minutes, which is much higher  
17 than the 85 minutes reported in a prospective, randomized, controlled study conducted in  
18 China<sup>33</sup> and exceeds the requirement of 90 minutes of advanced Chinese stroke centers,  
19 suggesting that the EVT process needs to be further optimized in the real world. However, we  
20 observed that the door-to-puncture time was similar in the off-hours group and the on-hours  
21 group, which suggests that the EVT process of the stroke center is as efficient off-hours as  
22 on-hours and that the emergency green channel, CT examination and DSA are not delayed

1 due to rest. Therefore, this study confirms that presenting off-hours did not cause a delay in  
2 the EVT door-to-puncture time in China.

3 We found that the reperfusion rate in the off-hours group was similar to that in the  
4 on-hours group, while the puncture-to-reperfusion time in the off-hours group was 8 minutes  
5 longer than that in the on-hours group. We speculate that such a time difference may come  
6 from the availability of the off-hours intervention team. According to experience at our center,  
7 for patients who require general intravenous anesthesia, the response of the anesthesiologist  
8 during off-hours may not be as good as that during on-hours. Furthermore, more junior  
9 doctors may be on duty during off-hours, the interventionalists available off-hours may not be  
10 as experienced as those available on-hours, and physician or staff fatigue during late-night  
11 procedures may cloud judgment or increase the risk of procedural complications<sup>34, 35</sup>. In the  
12 future, attention needs to be given to optimizing the configuration of the intervention team  
13 during off-hours to reduce the puncture-to-reperfusion time.

14 The definition of off-hours was set according to statutory holidays and time nodes. The  
15 ANGEL-ACT registry contains data from 111 hospitals in 26 provinces in China<sup>21</sup>. These  
16 hospitals share Beijing time in Dongba District, which is the standard time in China.  
17 Therefore, there is a possibility that when Dongba District has entered the evening, the  
18 Eastern Fifth District may still be during the day, so it is necessary to carefully define  
19 off-hours. We analyzed the locations of the 111 hospitals and found that 106 (95.4%)  
20 hospitals were located in the time zone of the East 8th District and East 7th District. These  
21 hospitals accounted for 1716 (95.9%) patients, which means that the time zone difference of  
22 95.9% patients was no more than 1 hour. We conducted a survey on the work and rest time of

1 all hospitals in the group;98.2% of the hospitals' work hours are 7:30-18:30, with off-hours  
2 of 17:00-8:00 in both summer and winter. Therefore, it is reasonable to choose 08:00 and  
3 17:30 when defining the time nodes of off-hours.

4 This study has some limitations. First, 17 of 1788 patients did not have 3-month  
5 follow-up data available from phone interviews; thus, the rates of poor outcomes or serious  
6 events may have been underestimated. Second, Saad et al found that the workflow interval  
7 had no effect on EVT in teaching hospitals but did have an effect on EVT in non-teaching  
8 hospitals<sup>36</sup>. Our study included stroke centers with 24-hour EVT capability, and most of them  
9 were teaching hospitals. Therefore, whether the results can be extended to all stroke centers  
10 in China still needs further study. Finally, our definition of off-hours included statutory  
11 holidays. However, some hospitals included in the study follow a normal work schedule on  
12 statutory holidays, and some hospitals even have a 24-hour neurointervention emergency  
13 team on duty. This may be the reason why the prognosis of Chinese patients receiving EVT  
14 during on-hours and off-hours was similar.

## 15 **Conclusion**

16 In conclusion, according to the nationwide real-world registry, off-hours presentation  
17 was associated with a delay in the visitand reperfusion time of EVT in patients with AIS, but  
18 this delay did not lead to worse radiological and clinical outcomes. In future optimization of  
19 the EVT process during off-hours, the onset-to-door time and onset-to-reperfusion time can  
20 be key targets for improvement.

## 21 **Data Availability**

1 The data that support this study are available from Zhongrong Miao (Department of  
2 Interventional Neuroradiology, Beijing Tiantan Hospital, Capital Medical  
3 University;email:[zhongrongm@163.com](mailto:zhongrongm@163.com)) upon reasonable request.

#### 4 **Sources of Funding**

5 This work was supported by the fifth "311 Project" Scientific Research Funding Project  
6 in Taizhou (RCPY202004) and Taizhou Municipal Science and Technology Bureau (CN)  
7 (SSF20200086). The funder had no role in the study design, data collection, data analysis,  
8 data interpretation, writing of the report, decision to publish, or preparation of the manuscript.

#### 9 **Acknowledgments**

10 We thank all participating hospitals, relevant clinicians, statisticians, and imaging and  
11 laboratory technicians.

#### 12 **Disclosures**

13 The authors report no conflicts.

#### 14 **Supplemental Materials**

15 ANGEL-ACT Study Group.

#### 16 **Reference**

- 17 1. Miao Z, Huo X, Gao F, Liao X, Wang C, Peng Y, et al. Endovascular therapy for acute  
18 ischemic stroke trial (east): Study protocol for a prospective, multicentre control trial  
19 in china. *Stroke Vasc Neurol*. 2016;1:44-51
- 20 2. Wang Y, Liao X, Zhao X, Wang DZ, Wang C, Nguyen-Huynh MN, et al. Using  
21 recombinant tissue plasminogen activator to treat acute ischemic stroke in china:

- 1           Analysis of the results from the chinese national stroke registry (cnsr). *Stroke*.
- 2           2011;42:1658-1664
- 3    3.     Fink JN, Selim MH, Kumar S, Voetsch B, Fong WC, Caplan LR. Insular cortex
- 4           infarction in acute middle cerebral artery territory stroke: Predictor of stroke severity
- 5           and vascular lesion. *Archives of neurology*. 2005;62:1081-1085
- 6    4.     Kodumuri N, Sebastian R, Davis C, Posner J, Kim EH, Tippet DC, et al. The
- 7           association of insular stroke with lesion volume. *NeuroImage. Clinical*.
- 8           2016;11:41-45
- 9    5.     Malhotra K, Gornbein J, Saver JL. Ischemic strokes due to large-vessel occlusions
- 10          contribute disproportionately to stroke-related dependence and death: A review.
- 11          *Frontiers in neurology*. 2017;8:651
- 12   6.     Smith WS, Lev MH, English JD, Camargo EC, Chou M, Johnston SC, et al.
- 13          Significance of large vessel intracranial occlusion causing acute ischemic stroke and
- 14          tia. *Stroke*. 2009;40:3834-3840
- 15   7.     Rennert RC, Wali AR, Steinberg JA, Santiago-Dieppa DR, Olson SE, Pannell JS, et al.
- 16          Epidemiology, natural history, and clinical presentation of large vessel ischemic
- 17          stroke. *Neurosurgery*. 2019;85:S4-s8
- 18   8.     Campbell BC, Mitchell PJ, Kleinig TJ, Dewey HM, Churilov L, Yassi N, et al.
- 19          Endovascular therapy for ischemic stroke with perfusion-imaging selection. *The New*
- 20          *England journal of medicine*. 2015;372:1009-1018

- 1     9.     Saver JL, Goyal M, Bonafe A, Diener HC, Levy EI, Pereira VM, et al. Stent-retriever  
2           thrombectomy after intravenous t-pa vs. T-pa alone in stroke. *The New England*  
3           *journal of medicine*. 2015;372:2285-2295
- 4     10.    Goyal M, Demchuk AM, Menon BK, Eesa M, Rempel JL, Thornton J, et al.  
5           Randomized assessment of rapid endovascular treatment of ischemic stroke. *The New*  
6           *England journal of medicine*. 2015;372:1019-1030
- 7     11.    Jovin TG, Chamorro A, Cobo E, de Miquel MA, Molina CA, Rovira A, et al.  
8           Thrombectomy within 8 hours after symptom onset in ischemic stroke. *The New*  
9           *England journal of medicine*. 2015;372:2296-2306
- 10    12.    Berkhemer OA, Fransen PS, Beumer D, van den Berg LA, Lingsma HF, Yoo AJ, et al.  
11          A randomized trial of intraarterial treatment for acute ischemic stroke. *The New*  
12          *England journal of medicine*. 2015;372:11-20
- 13    13.    Saver JL. Time is brain--quantified. *Stroke*. 2006;37:263-266
- 14    14.    Goyal M, Menon BK, van Zwam WH, Dippel DW, Mitchell PJ, Demchuk AM, et al.  
15          Endovascular thrombectomy after large-vessel ischaemic stroke: A meta-analysis of  
16          individual patient data from five randomised trials. *Lancet (London, England)*.  
17          2016;387:1723-1731
- 18    15.    Mulder M, Jansen IGH, Goldhoorn RB, Venema E, Chalos V, Compagne KCJ, et al.  
19          Time to endovascular treatment and outcome in acute ischemic stroke: Mr clean  
20          registry results. *Circulation*. 2018;138:232-240

- 1 16. Hinsenveld WH, de Ridder IR, van Oostenbrugge RJ, Vos JA, Groot AE, Coutinho  
2 JM, et al. Workflow intervals of endovascular acute stroke therapy during on- versus  
3 off-hours: The mr clean registry. *Stroke*. 2019;50:2842-2850
- 4 17. Regenhardt RW, Mecca AP, Flavin SA, Boulouis G, Lauer A, Zachrison KS, et al.  
5 Delays in the air or ground transfer of patients for endovascular thrombectomy. *Stroke*.  
6 2018;49:1419-1425
- 7 18. Nikoubashman O, Schürmann K, Othman AE, Bach JP, Wiesmann M, Reich A.  
8 Improvement of endovascular stroke treatment: A 24-hour neuroradiological on-site  
9 service is not enough. *Biomed Res Int*. 2018;2018:9548743
- 10 19. Ogita M, Suwa S, Ebina H, Nakao K, Ozaki Y, Kimura K, et al. Off-hours  
11 presentation does not affect in-hospital mortality of japanese patients with acute  
12 myocardial infarction: J-minuet substudy. *Journal of cardiology*. 2017;70:553-558
- 13 20. Jansen IGH, Mulder M, Goldhoorn RB. Endovascular treatment for acute ischaemic  
14 stroke in routine clinical practice: Prospective, observational cohort study (mr clean  
15 registry). *BMJ (Clinical research ed.)*. 2018;360:k949
- 16 21. Jia B, Ren Z, Mokin M, Burgin WS, Bauer CT, Fiehler J, et al. Current status of  
17 endovascular treatment for acute large vessel occlusion in china: A real-world  
18 nationwide registry. *Stroke*. 2021;52:1203-1212
- 19 22. Zaidat OO, Yoo AJ, Khatri P, Tomsick TA, von Kummer R, Saver JL, et al.  
20 Recommendations on angiographic revascularization grading standards for acute  
21 ischemic stroke: a consensus statement. *Stroke*. 2013;44(9):2650-2663

- 1     23.     von Kummer R, Broderick JP, Campbell BC, Demchuk A, Goyal M, Hill MD, et al.  
2             The heidelberg bleeding classification: Classification of bleeding events after  
3             ischemic stroke and reperfusion therapy. *Stroke*. 2015;46:2981-2986
- 4     24.     Potts MB, Abdalla RN, Golnari P, Sukumaran M, Palmer AH, Hurley MC, et al.  
5             Analysis of mechanical thrombectomy for acute ischemic stroke on nights and  
6             weekends versus weekdays at comprehensive stroke centers. *Journal of stroke and*  
7             *cerebrovascular diseases : the official journal of National Stroke Association*.  
8             2021;30:105632
- 9     25.     Tschoe C, Kittel C, Brown P, Hafeez M, Kan P, Alawieh A, et al. Impact of off-hour  
10            endovascular therapy on outcomes for acute ischemic stroke: Insights from star.  
11            *Journal of neurointerventional surgery*. 2020
- 12    26.     Groot AE, de Bruin H, Nguyen TTM, Kappelhof M, de Beer F, Visser MC, et al.  
13            Presentation outside office hours does not negatively influence treatment times for  
14            reperfusion therapy for acute ischemic stroke. *Journal of neurology*.  
15            2021;268:133-139
- 16    27.     Kaaouana O, Bricout N, Casolla B, Caparros F, Schiava LD, Mounier-Vehier F, et al.  
17            Mechanical thrombectomy for ischaemic stroke in the anterior circulation: Off-hours  
18            effect. *Journal of neurology*. 2020;267:2910-2916
- 19    28.     Benali A, Moynier M, Dargazanli C, Deverdun J, Cagnazzo F, Mourand I, et al.  
20            Mechanical thrombectomy in nighttime hours: Is there a difference in 90-day clinical  
21            outcome for patients with ischemic stroke? *AJNR. American journal of*  
22            *neuroradiology*. 2021;42:530-537

- 1 29. Zaeske C, Goertz L, Kottlors J, Schlamann M, Onur OA, Maus V, et al. Mortality  
2 after mechanical thrombectomy in anterior circulation stroke may be higher at  
3 nighttime and on weekends. *Eur Radiol.* 2020
- 4 30. Herm J, Schlemm L, Siebert E, Bohner G, Alegiani AC, Petzold GC, et al. How do  
5 treatment times impact on functional outcome in stroke patients undergoing  
6 thrombectomy in germany? Results from the german stroke registry. *International*  
7 *journal of stroke : official journal of the International Stroke Society.*  
8 2021:1747493020985260
- 9 31. Shah S, Xian Y, Sheng S, Zachrison KS, Saver JL, Sheth KN, et al. Use, temporal  
10 trends, and outcomes of endovascular therapy after interhospital transfer in the united  
11 states. *Circulation.* 2019;139:1568-1577
- 12 32. Ding Y, Ji Z, Ma L, Zhai T, Gu Z, Niu J, et al. Interhospital transfer on intravenous  
13 thrombolysis in patients with acute ischemic stroke in three chinese municipal stroke  
14 centers. *Journal of thrombosis and thrombolysis.* 2019;48:580-586
- 15 33. Yang P, Zhang Y, Zhang L, Zhang Y, Treurniet KM, Chen W, et al. Endovascular  
16 thrombectomy with or without intravenous alteplase in acute stroke. *The New*  
17 *England journal of medicine.* 2020;382:1981-1993
- 18 34. Mohammed MA, Sidhu KS, Rudge G, Stevens AJ. Weekend admission to hospital has  
19 a higher risk of death in the elective setting than in the emergency setting: A  
20 retrospective database study of national health service hospitals in england. *BMC*  
21 *health services research.* 2012;12:87

- 1 35. Freemantle N, Ray D, McNulty D, Rosser D, Bennett S, Keogh BE, et al. Increased  
2 mortality associated with weekend hospital admission: A case for expanded seven day  
3 services? *BMJ (Clinical research ed.)*. 2015;351:h4596
- 4 36. Saad A, Adil MM, Patel V, Owada K, Winningham MJ, Nahab F. Clinical outcomes  
5 after thrombectomy for acute ischemic stroke on weekends versus weekdays. *Journal*  
6 *of stroke and cerebrovascular diseases : the official journal of National Stroke*  
7 *Association*. 2014;23:2708-2713
- 8
- 9
- 10

1 Table 1. Baseline Characteristics (median, IQR/ n, %)

| Items                               | On-hours<br>(n=709) | Off-hours<br>(n=1079) | <i>P</i> |
|-------------------------------------|---------------------|-----------------------|----------|
| Age,y                               | 65(55-73)           | 66(56-73)             | 0.496    |
| Men                                 | 469(66.2)           | 705(65.3)             | 0.760    |
| Baseline NIHSS (n=1780)             | 16(12-22)           | 16(12-21)             | 0.320    |
| PremRS (n=1787)                     | 0(0-0)              | 0(0-0)                | 0.539    |
| Baseline ASPECTS (n=1773)           | 9(7-10)             | 9(7-10)               | 0.414    |
| SBP (mmHg)                          | 145(130-160)        | 145(131-162)          | 0.882    |
| Medical history                     |                     |                       |          |
| Hypertension                        | 411(58.0)           | 616(57.1)             | 0.732    |
| Diabetes                            | 118(16.6)           | 213(19.7)             | 0.106    |
| Hyperlipidemia                      | 66(9.3)             | 93(8.6)               | 0.612    |
| Coronary heart disease              | 111(15.7)           | 162(15.0)             | 0.737    |
| Atrial fibrillation                 | 217(30.6)           | 344(31.9)             | 0.602    |
| Previous stroke                     | 159(22.4)           | 238(22.1)             | 0.862    |
| Smoking (recent or current)         | 292(41.2)           | 424(39.3)             | 0.430    |
| IVT performed                       | 491(69.3)           | 774(71.7)             | 0.265    |
| Interhospital transfer              | 227(32.0)           | 399(37.0)             | 0.033    |
| Anesthesia                          |                     |                       | 0.384    |
| Local anesthesia only               | 322(45.4)           | 455(42.2)             |          |
| General anesthesia                  | 274(38.7)           | 447(41.4)             |          |
| Local anesthesia plus sedation      | 113(15.9)           | 177(16.4)             |          |
| Occlusion site                      |                     |                       | 0.912    |
| Internal carotid artery             | 185(26.1)           | 269(24.9)             |          |
| M1                                  | 298(42.0)           | 471(43.7)             |          |
| Basilar/ vertebral artery           | 149(21.0)           | 222(20.6)             |          |
| Other                               | 77(10.9)            | 117(10.8)             |          |
| Stroke classification               |                     |                       | 0.875    |
| Large atherosclerotic stroke        | 344(48.5)           | 533(49.4)             |          |
| Cardiogenic cerebral embolism       | 229(32.3)           | 346(32.0)             |          |
| Other stroke with definite etiology | 79(11.1)            | 124(11.5)             |          |
| Stroke of unknown etiology          | 57(8.0)             | 76(7.0)               |          |

2 Total number is 1788, unless otherwise indicated.

3 NIHSS indicates National Institutes of Health Stroke Scale; mRS, modified Rankin Scale; ASPECTS, Alberta

4 Stroke Program Early CT Score; SBP, systolic pressure; IVT, intravenous therapy; M1, first segment of the

5 middle cerebral artery.

6

1 Table 2. Workflow intervals (median, IQR)

| Items                                 | On-hours<br>(n=709) | Off-hours<br>(n=1079) | <i>P</i> |
|---------------------------------------|---------------------|-----------------------|----------|
| Door-to-puncture time (n=1787)        | 124.5(81.5-190)     | 123(83-175)           | 0.164    |
| Onset-to-puncture time (n=1774)       | 290(200-431)        | 305(218-445)          | 0.078    |
| Onset-to-door time (n=1754)           | 125(60-260)         | 165(70-295)           | 0.002    |
| Door-to-imaging time (n=1523)         | 15(0-30)            | 14(0-28)              | 0.345    |
| Onset-to-needle time (n=410)          | 160(110-220)        | 159.5(119.5-213)      | 0.843    |
| Puncture-to-reperfusion time (n=1788) | 80 ( 50-128 )       | 88 ( 55-130 )         | 0.078    |
| Onset-to-reperfusion time (n=1774)    | 392(285-546)        | 410(310-561)          | 0.027    |

2

1 Table 3. Clinical outcomes (median, IQR/ n, %)

| Items                                       | On-hours<br>(n=709) | Off-hours<br>(n=1079) | Unadjusted OR<br>(95% CI) | Unadjusted<br><i>P-value</i> | Adjusted OR<br>(95% CI) | Adjusted<br><i>P-value</i> |
|---------------------------------------------|---------------------|-----------------------|---------------------------|------------------------------|-------------------------|----------------------------|
| mRS at 90 d<br>(n=1771)                     | 3(0-5)              | 3(0-5)                | 0.942(0.794-1.118)        | 0.493                        | 0.892(0.748-1.064)      | 0.204                      |
| mRS (0-2) at 90 d<br>(n=1771)               | 306(45.7)           | 466(44.7)             | 0.960(0.790-1.166)        | 0.691                        | 0.892(0.724-1.098)      | 0.280                      |
| Reperfusion rate<br>(TICI 2b-3)<br>(n=1788) | 618(87.2)           | 955(88.5)             | 1.134(0.850-1.514)        | 0.414                        | 1.087(0.809-1.462)      | 0.579                      |
| Mortality at 90 d<br>(n=1771)               | 101(14.3)           | 172(15.9)             | 1.142(0.875-1.490)        | 0.347                        | 1.214(0.919-1.603)      | 0.172                      |
| sICH within 24h<br>(n=1695)                 | 56(8.4)             | 74(7.2)               | 0.842(0.586-1.209)        | 0.352                        | 0.878(0.606-1.272)      | 0.492                      |

2 mRS indicates modified Rankin Scale;TICI, Thrombolysis in Cerebral Infarction; sICH, symptomatic

3 intracranial hemorrhage.

4

1 Figure 1. Distribution of modified Rankin Scale (mRS) scores at 90 days.

2

Off-hours

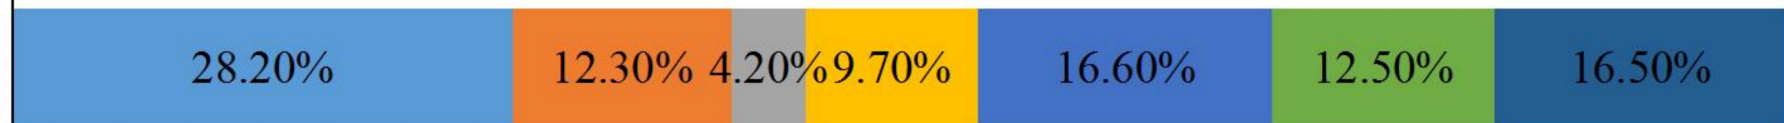

On-hours

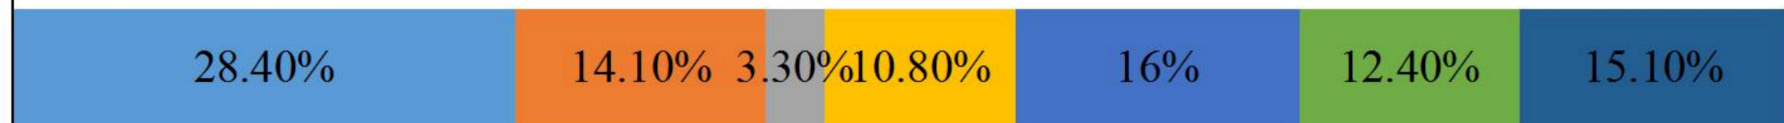

0%

20%

40%

60%

80%

100%

mRS 0

mRS 1

mRS 2

mRS 3

mRS 4

mRS 5

mRS 6
